# Supplementary material for: Nearly monodispersed In(OH)3hierarchical nanospheres and nanocubes: tunable ligand-assisted synthesis and their conversion into hierarchical In2O3for gas sensing
Source: Royal Society of Chemistry journal article supplement (doi:10.1039/c2ta00750a), 2012-10-19
Supplement: c2ta00750a.pdf [file c2ta00750a.pdf]

**Supporting Information**

# Nearly Monodispersed In(OH)<sub>3</sub> Hierarchical Nanospheres and Nanocubes: Tunable Ligand-Assisted Synthesis and Their Conversion into Hierarchical In<sub>2</sub>O<sub>3</sub> for Gas Sensing

*Jiantao Zai,<sup>a</sup> Jun Zhu,<sup>\*a,b</sup> Rongrong Qi<sup>\*a</sup> and Xuefeng Qian<sup>a</sup>*

<sup>a</sup> School of Chemistry and Chemical Engineering and State Key Laboratory of Metal Matrix Composites, Shanghai Jiao Tong University, Shanghai, 200240 (P. R. China).

<sup>b</sup> National Engineering Research Center for Nanotechnology, 28 East Jiang Chuan Rd, Shanghai 200241(P. R. China).

Corresponding authors: Fax:(+86) 21-5474-1297; Tel: (+86) 21-5474-3262;E-mail:rrqi@sjtu.edu.cn;  
Tel: (+86) 21-3429-1286; Fax: (+86) 21-3429-1125, E-mail: yzjzhu@163.com.

## Supporting Information 1

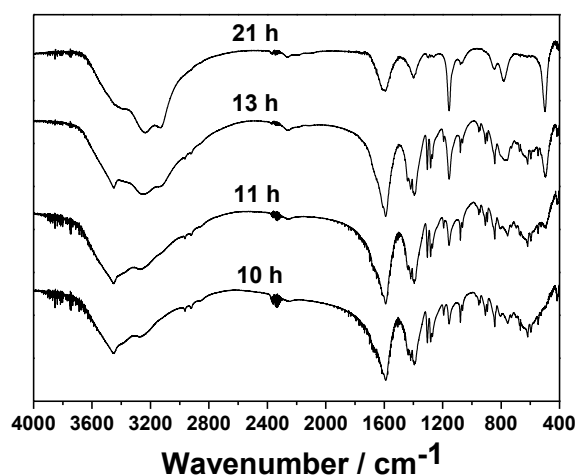

**Figure S1.** FT-IR spectra of  $\text{In}(\text{OH})_3$  obtained in the time-dependent experiments.

The time-evaluated FT-IR spectra of intermediate samples are shown in Figure S1. Extending the reaction time, the intensity of  $-\text{OH}$  characteristic peak between  $3450\text{ cm}^{-1}$  decreases, and the intensity of  $-\text{NH}_2$  characteristic peak at  $3127\text{ cm}^{-1}$  increases. The characteristic peak of  $-\text{NH}_2$  becomes visible at the reaction time of 13 h.

## Supporting Information 2

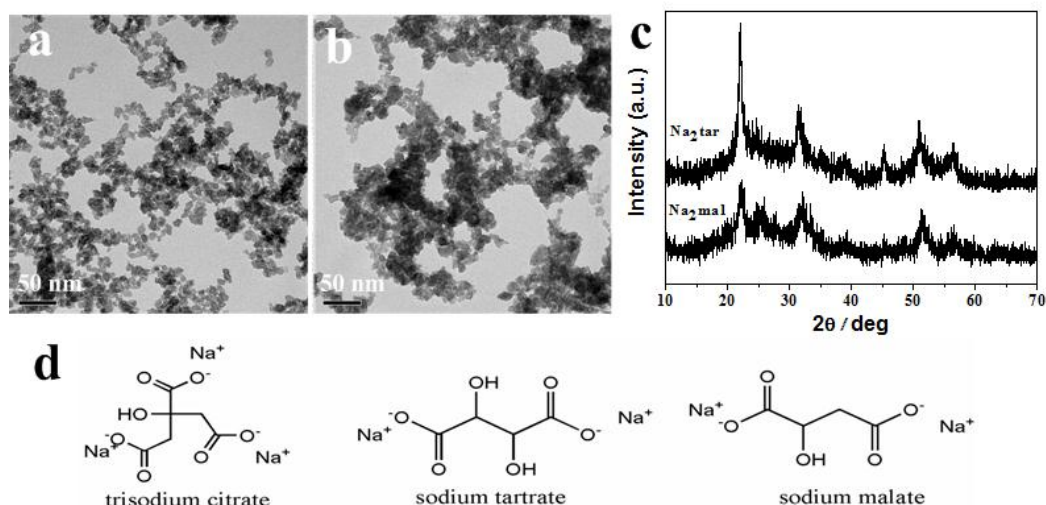

**Figure S2.** (a-b) TEM images and (c) XRD pattern of  $\text{In}(\text{OH})_3$  obtained at  $140\text{ }^\circ\text{C}$ , 6:1 molar ratio of Ligand/ $\text{In}^{3+}$  with different complexing agent: (a)  $\text{Na}_2\text{tar}$ , (b)  $\text{Na}_2\text{mal}$ , (d) the chemical configuration of the complexing agents.

As shown in Figure S2, it is found that irregular nanoparticles rather than well-aggregations are obtained using  $\text{Na}_2\text{tar}$  (Figure S2a) or  $\text{Na}_2\text{mal}$  (Figure S2b) as complexing agents even though the pure  $\text{In}(\text{OH})_3$  can be obtained (Figure S2c). The above results reveal that  $\text{Na}_2\text{tar}$  and  $\text{Na}_2\text{mal}$  can effectively control the crystal growth of  $\text{In}(\text{OH})_3$  nanoparticles, but hinder these nanoparticles to assemble hierarchical morphologies. The possible reasons come from the molecule structural difference between  $\text{Na}_3\text{cit}$ ,  $\text{Na}_2\text{tar}$  and  $\text{Na}_2\text{mal}$  (Figure S2d). It is evident that  $\text{Na}_3\text{cit}$  has three carboxyls, while both  $\text{Na}_2\text{tar}$  molecule and  $\text{Na}_2\text{mal}$  molecule have two carboxyls. Generally, the binding of citric acid to the crystal plane proceeds through the two methylene-carboxyl groups. The carboxyl group that is shorter than the methylene-carboxyl groups does not reach the surface and remains passive but it activates all oxygen atoms of the methylene-carboxyl groups by accepting a hydrogen atom. Thus, in present system,  $\text{COO}^-$  ions of two methylene-carboxyl groups in  $\text{Na}_3\text{cit}$  molecule bind to the  $\text{In}(\text{OH})_3$  nanoparticles and the other  $\text{COO}^-$  ions in  $\text{Na}_3\text{cit}$  molecule can interact with other functional groups through hydrogen bonding. However, there are no free  $\text{COO}^-$  in  $\text{Na}_2\text{tar}$  molecule and  $\text{Na}_2\text{mal}$  molecule for the formation of

additional hydrogen bonding after binding with  $\text{In}(\text{OH})_3$  nanoparticles, which lead to the irregular nanoparticles instead of well-aggregations.

### Supporting Information 3

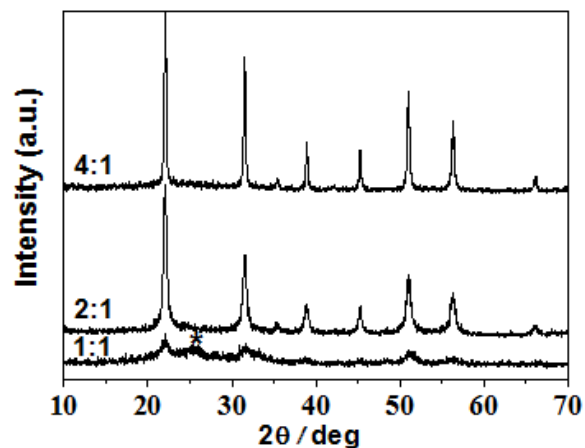

**Figure S3.** XRD patterns of  $\text{In}(\text{OH})_3$  obtained at  $140^\circ\text{C}$  with different molar ratio of  $\text{cit}^{3-}/\text{In}^{3+}$ .

### Supporting Information 4

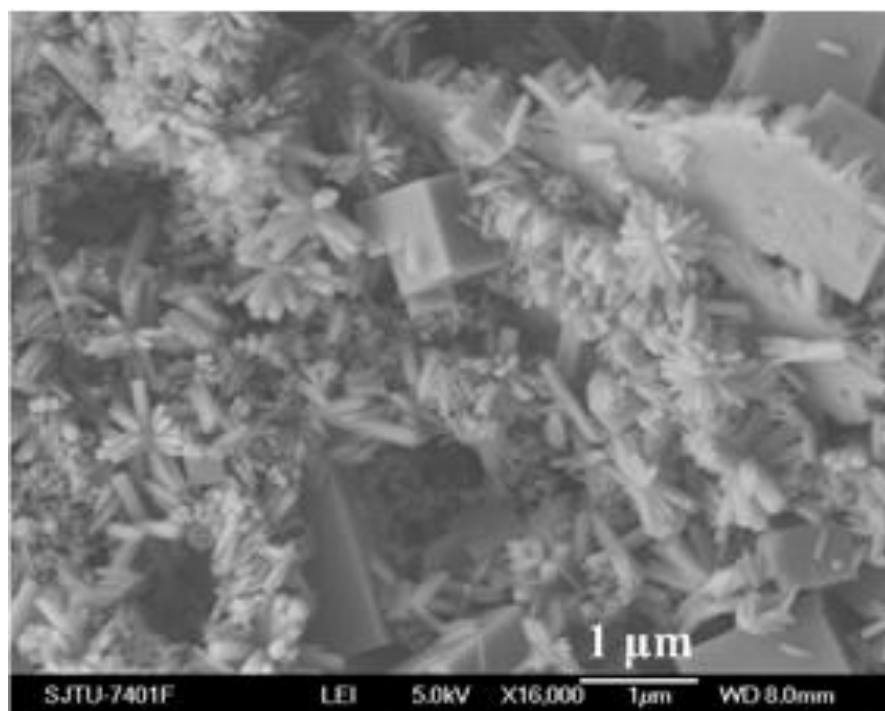

**Figure S4.** SEM images of  $\text{In}(\text{OH})_3$  obtained at  $140^\circ\text{C}$  for 24 h in absence of  $\text{Na}_3\text{cit}$ .

## Supporting Information 5

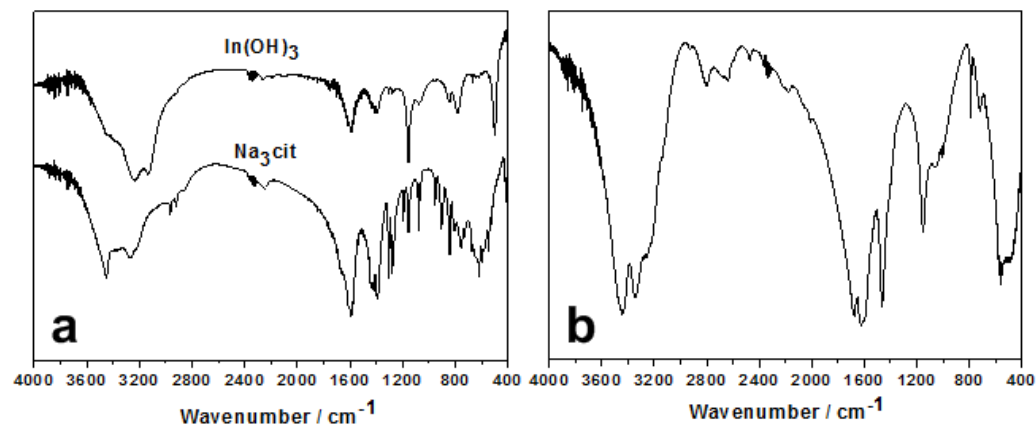

**Figure S5.** (a) FT-IR spectra of  $\text{Na}_3\text{cit}$  and  $\text{In(OH)}_3$  obtained at 140 °C with 6:1 molar ratio of  $\text{cit}^{3-}/\text{In}^{3+}$  for 24 h; (b) FT-IR spectra of urea.

The FT-IR spectra of  $\text{Na}_3\text{cit}$  and  $\text{In(OH)}_3$  obtained at 140 °C with 6:1 molar ratio of  $\text{cit}^{3-}/\text{In}^{3+}$  for 24 h are shown in Figure S5a. In the spectra of  $\text{Na}_3\text{cit}$ , two strong bands at 1592 and 1397  $\text{cm}^{-1}$  are attributed to characteristic asymmetric and symmetric stretching vibrations of  $\text{COO}^-$ , respectively. The bands between 3450 and 3260  $\text{cm}^{-1}$  corresponds to characteristic stretching vibration of OH group. In addition, the  $\text{OH}$  group gives the deformation vibration bands at 1290, 1210, 1089 and 1080  $\text{cm}^{-1}$ , which are also characteristic of undissociated alcoholic  $\text{OH}$  group. However, compared with the FT-IR spectra of urea (Figure S5b), in the spectra of  $\text{In(OH)}_3$  product, two strong bands at 3242 and 3127  $\text{cm}^{-1}$  could be found besides the strong absorption peaks at 500  $\text{cm}^{-1}$  of  $\text{In(OH)}_3$ , which results from the stretching vibration of  $\text{NH}_3$ . Additionally, a weak bands at about 1750  $\text{cm}^{-1}$  (indicated by arrow) also appears, which comes from stretching vibration of  $\text{C=O}$  group in  $\text{COO}^-$ . Meanwhile, due to the formation of hydrogen bonding of  $\text{OH}$  group in  $\text{Na}_3\text{cit}$ , the peak at 3260  $\text{cm}^{-1}$  of  $\text{OH}$  group in  $\text{Na}_3\text{cit}$

disappears and the peak at  $3450\text{ cm}^{-1}$  of  $\text{-OH}$  group in  $\text{Na}_3\text{cit}$  becomes broad. These results reveals that there are many hydrogen bonding interactions among functional groups, such as  $\text{-OH}$ ,  $\text{-C=O}$ ,  $\text{-NH}_2$  and  $\text{-COO-}$  ion and these hydrogen bonding interactions contribute to the formation of assembled  $\text{In}(\text{OH})_3$  nanostructures. In other words, both  $\text{Na}_3\text{cit}$  and  $\text{NH}_3$  can absorb on  $\text{In}(\text{OH})_3$  nanoparticles and then contribute to the assembly of  $\text{In}(\text{OH})_3$  nanoparticles through interaction between  $\text{Na}_3\text{cit}$  and  $\text{NH}_3$  molecules on adjacent nanoparticles.

### Supporting Information 6

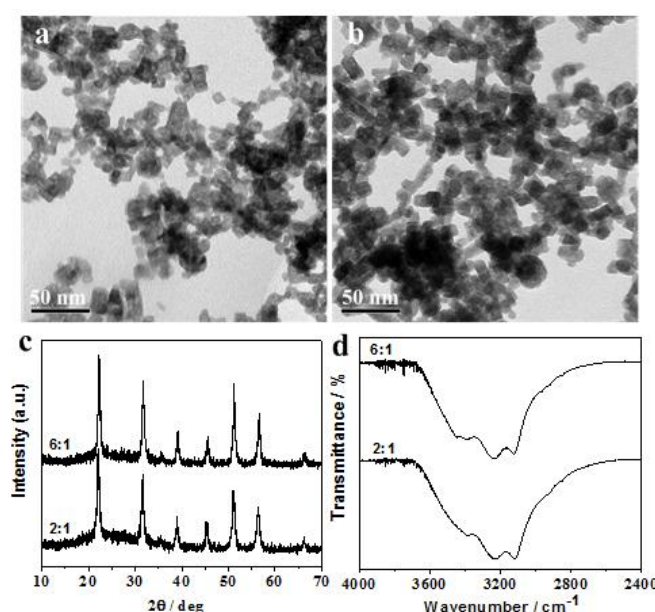

**Figure S6.** (a-b) TEM images, (c) XRD patterns and (d) FT-IR spectra of  $\text{In}(\text{OH})_3$  obtained at  $140\text{ }^{\circ}\text{C}$ , En as alkaline source with different molar ratio of  $\text{cit}^{3-}/\text{In}^{3+}$ : (a) 2:1; (b) 6:1.

Urea was replaced by En to perform at similar reaction condition. However, the obtained products are also irregular nanocubes instead of well-aggregations no matter the molar ratio of  $\text{cit}^{3-}/\text{In}^{3+}$  (Figures S6a-b) even if the samples are high purity in XRD pattern (Figure S6c). In comparison with that of urea, functional group of  $\text{-C=O}$  in urea is substituted by  $\text{-CH}_2$  group in En. This goes against the hydrogen bonding, which have been proved by FT-IR spectra (Figure S6d). In the FT-IR spectra, the relative intensity of  $\text{-OH}$  peaks of  $\text{Na}_3\text{cit}$  are stronger than that in the  $\text{Na}_3\text{cit}$ /urea system, indicating most of  $\text{-OH}$  groups of  $\text{Na}_3\text{cit}$  are free from the formation of hydrogen bonding.

## Supporting Information 7

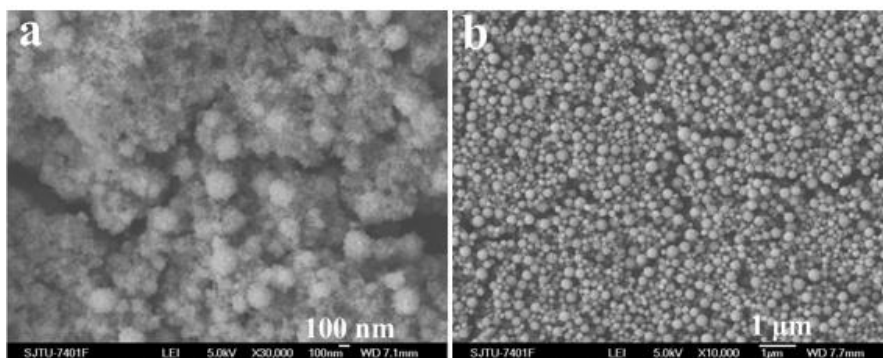

**Figure S7.** SEM images of  $\text{In}(\text{OH})_3$  obtained at 140 °C, 0.8 mmol of  $\text{Na}_3\text{cit}$  with different molar ratio of  $\text{EDTA}/\text{In}^{3+}$ : (a) 0.5 : 1; (b) 1 : 1.

In order to further explore the real factors affecting the morphologies or the self-assembled styles of  $\text{In}(\text{OH})_3$ , the additional ligand including multi-group, such as EDTA, were introduced to the present system, the hierarchical  $\text{In}(\text{OH})_3$  assembly could be reformed. As shown in Figure S7, with the addition of EDTA, the morphology of  $\text{In}(\text{OH})_3$  changes from nanoparticles, to part-assembled spherical structures and to full-assembled spherical structures at the 2:1 molar ratio of  $\text{cit}^{3-}/\text{In}^{3+}$ . The reasons can be attributed to the hydrogen bonding between  $\text{Na}_3\text{cit}$  and in EDTA. Therefore, based on the above experiment results, both  $\text{Na}_3\text{cit}$  and urea contributes to the formation of hierarchically assembled  $\text{In}(\text{OH})_3$  structures inducing by hydrogen bonding interactions.

### Supporting Information 8

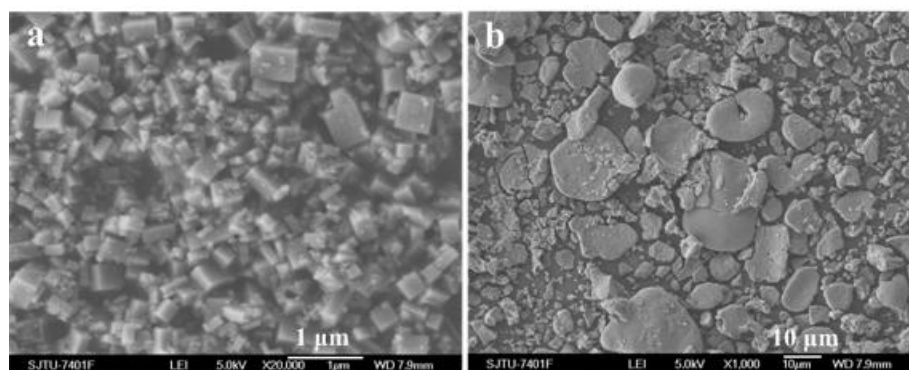

**Figure S8.** SEM images of  $\text{In}(\text{OH})_3$  obtained at 140 °C with 6:1 molar ratio of  $\text{cit}^{3-}/\text{In}^{3+}$  for 24 h with different alkaline source: (a) NaOH; (b)  $\text{NH}_3 \cdot \text{H}_2\text{O}$ .

### Supporting Information 9

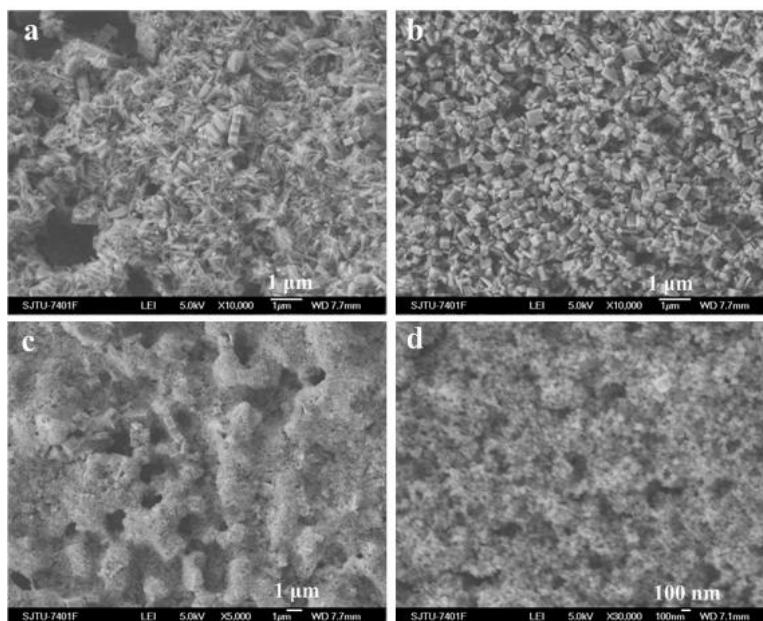

**Figure S9.** SEM images of  $\text{In}(\text{OH})_3$  obtained in the system of EDTA at different molar ratio of EDTA/ $\text{In}^{3+}$ : (a) 0.2 : 1; (b) 0.5 : 1; (c) 0.8 : 1; (d) 1 : 1.

## Supporting Information 10

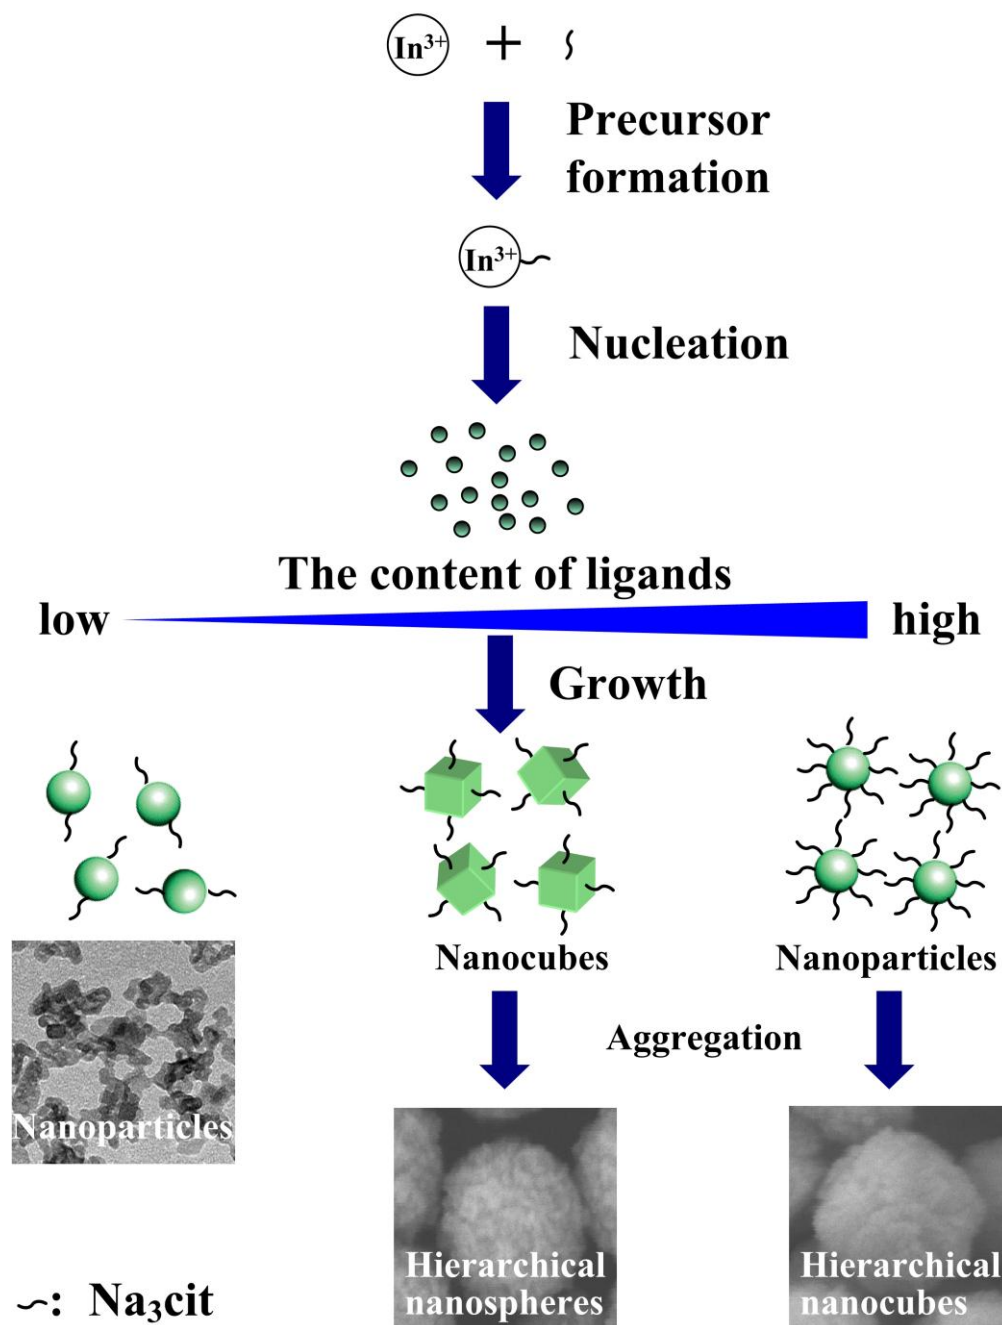

**Figure S10.** Schematic illustration of the formation process of  $\text{In}(\text{OH})_3$  different morphologies or hierarchical structures, such as nanoparticles, monodispersed hierarchical nanospheres and nanocubes.

From the schematic illustration of Figure S10, one can see that ligand was first complexed with  $\text{In}^{3+}$  ions to create  $\text{In}(\text{cit})_n$  complexation, which would affect the nucleation rate of  $\text{In}(\text{OH})_3$ . On the other hand, the added ligand also can absorb on the surface of  $\text{In}(\text{OH})_3$  crystallites, and further affect the final morphology of the obtained products. For example, only nanoparticles were obtained because of the

incomplete capping of primary  $\text{In}(\text{OH})_3$  crystallites in the lower content of ligands; nanospheres “building blocks” were obtained because of the excess capping of primary  $\text{In}(\text{OH})_3$  crystallites in the higher content of ligands; and nanocubes “building blocks” were only obtained at suitable content of ligands, because of the co-effects of  $\text{In}(\text{OH})_3$  inherent crystal nature and the selective absorption of ligand on the facets of  $\text{In}(\text{OH})_3$ .

## Supporting Information 11

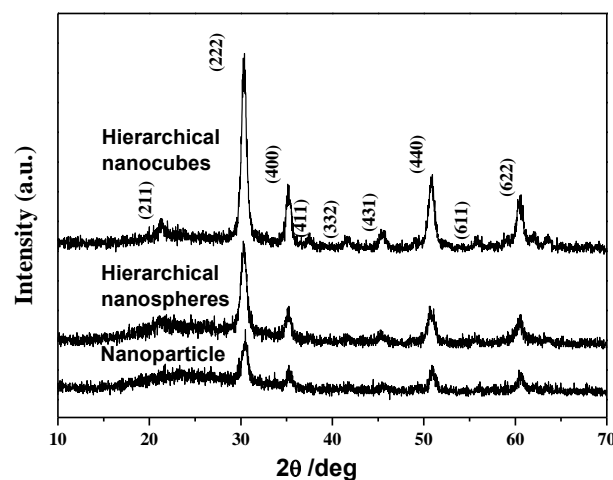

**Figure S11.** XRD patterns of  $\text{In}_2\text{O}_3$  different nanostructures annealing the corresponding  $\text{In}(\text{OH})_3$  samples.

## Supporting Information 12

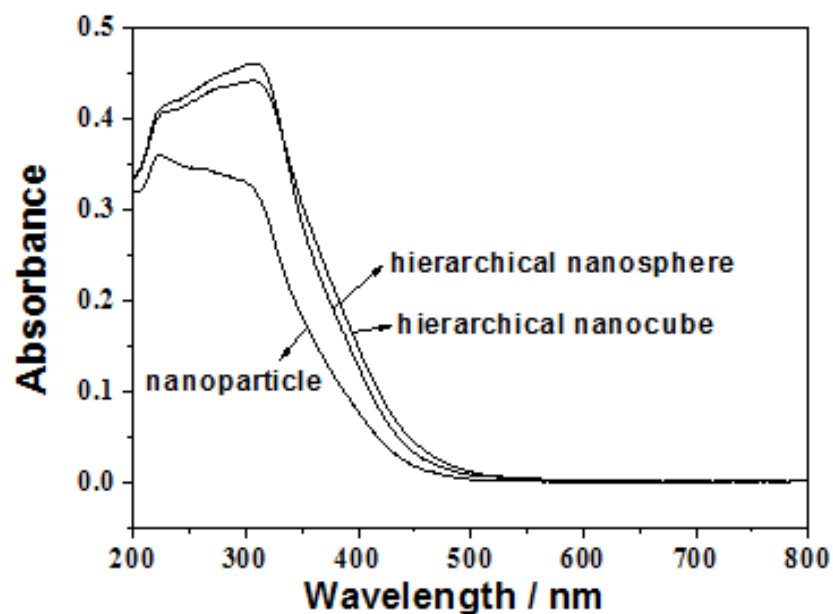

**Figure S12** UV-diffuse reflectance spectrum of the  $\text{In}_2\text{O}_3$  samples of nanoparticles, hierarchical nanosphere and hierarchical nanocube.

Diffuse reflectance spectroscopy (DRS) and its applications in studying metal oxides have been reviewed recently.<sup>26</sup> As a kind of n-type semiconductor with direct band gap,  $\text{In}_2\text{O}_3$  has been widely

studied because of its potential application for solar cell combining with a suitable p-type semiconductor. The UV-diffuse reflectance spectra of the as-obtained  $\text{In}_2\text{O}_3$  nanostructures with different morphology are shown in Fig. 7. Different from the absorption of bulk  $\text{In}_2\text{O}_3$  at 330 nm (3.75 eV), the absorption peaks of all  $\text{In}_2\text{O}_3$  products are among 300-310 nm. The blue-shift of absorption peaks implies that the obtained  $\text{In}_2\text{O}_3$  particles are in nano-size and possess a weak quantum confinement effect. Compared to the absorption peak of nanoparticles at 300 nm, the absorption peaks of hierarchical  $\text{In}_2\text{O}_3$  nanospheres and nanocubes are at about 310 nm because the scattering of light reduces the absorption of as-obtained hierarchical nanostructures when  $\text{In}_2\text{O}_3$  nanoparticles aggregate to larger and uniformly hierarchical nanostructures.<sup>27</sup> In addition, all absorption bands of the as-obtained  $\text{In}_2\text{O}_3$  nanostructures yielded an onset at around 450 nm, indicating the wide band gap of the as-obtained  $\text{In}_2\text{O}_3$  nanostructures. These results imply that the UV-vis character of  $\text{In}_2\text{O}_3$  nanostructures is sensitive to their size and shape.

### Supporting Information 13

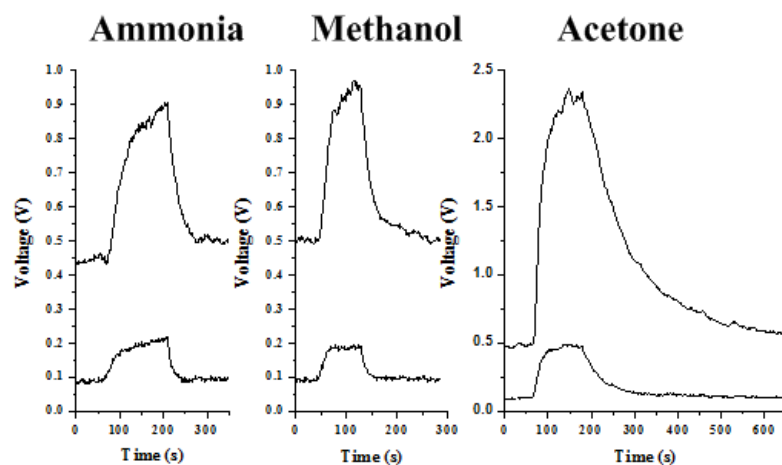

**Figure S13.** Typical response curves of  $\text{In}_2\text{O}_3$  hierarchical nanocubes gas sensor (top curve) and  $\text{In}_2\text{O}_3$  hierarchical nanospheres gas sensor (bottom curve) to different gases with a certain concentration of 400 ppm.

## Supporting Information 14

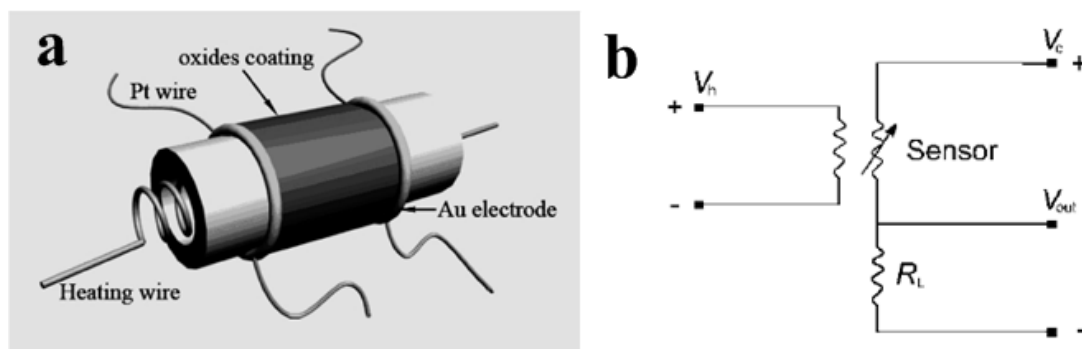

**Figure S14.** (a) Sketch of the gas sensor and (b) measuring electric circuit of the gas sensor.

## Supporting Information 15

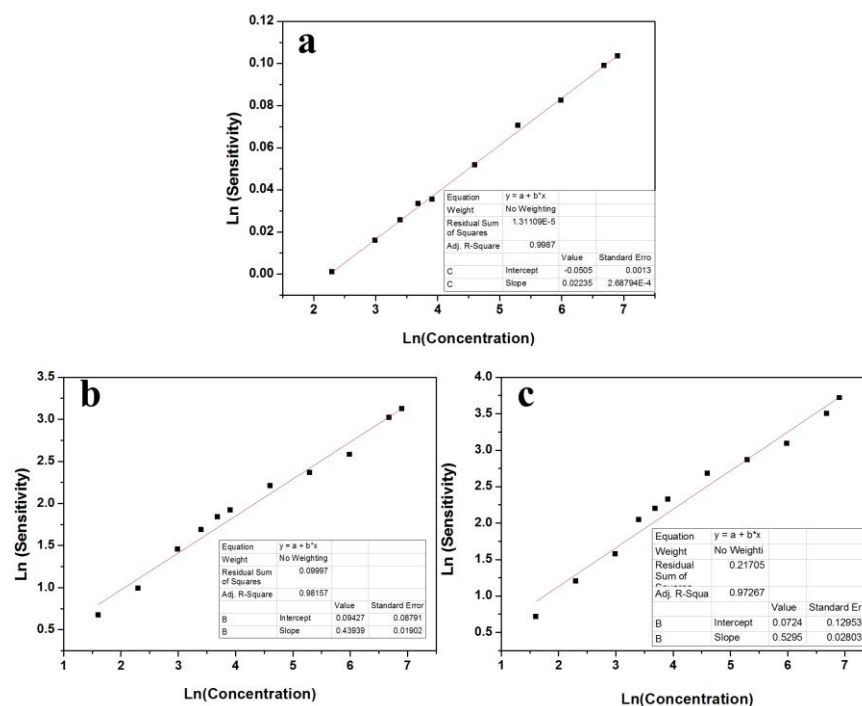

**Figure S15.** The line relations of  $\ln(\text{sensitivity})$  to  $\ln(\text{concentration})$  of (a)  $\text{In}_2\text{O}_3$  nanoparticle sensors, (b) hierarchical  $\text{In}_2\text{O}_3$  nanosphere sensors and (c) hierarchical  $\text{In}_2\text{O}_3$  nanocube sensors.
